# Supplementary material for: Cluster assemblies as superatomic solids: a first principles study of bonding & electronic structure
Source: Royal Society of Chemistry journal article supplement (doi:10.1039/c7cp06755k), 2018-01-01
Supplement: c7cp06755k1.pdf [file c7cp06755k1.pdf]

## Supplementary Information

### Content

#### 1 Au<sub>12</sub>Al-C<sub>60</sub>

##### 1.1 PBE relaxed structure

##### 1.2 PBE+D3 relaxed structure

#### 2 Au<sub>12</sub>Al-B<sub>11</sub>H<sub>14</sub>

##### 2.1 PBE relaxed structure

##### 2.2 PBE+D3 relaxed structure

#### 3 Au<sub>12</sub>Al-Au<sub>13</sub>

##### 3.1 PBE relaxed structure

##### 3.2 PBE+D3 relaxed structure

#### 1 Au<sub>12</sub>Al-C<sub>60</sub>

##### 1.1 PBE relaxed structure

structure in direct coordinates:

1.0000000000000000

10.5854564129533912 -0.1834211752347865 11.4753730727637375

10.6964439257361974 12.6576516380275255 -0.3097856193297479

-0.1515992496062846 12.5009145571304892 11.4348691223516301

Au Al S C H

24 1 18 78 54

Direct

0.4619733558832237 0.5920014163335381 0.3232215212297689

0.5556398339515098 0.3794364217926471 0.4081343483025037  
0.3432802465210827 0.4483023664775345 0.5129549446693815  
0.6550039589599024 0.5470702585462917 0.3131147809071564  
0.5043497110720310 0.6996012279665393 0.3884831992577205  
0.6084048812626364 0.7556664084800246 0.1386964737530008  
0.2100918326780956 0.6228124320610391 0.3846405204468866  
0.6255456115090681 0.5342380456559823 0.1510167058360992  
0.1280072194823347 0.5175070160343225 0.6453189875220602  
0.3141755906782180 0.6290014402424688 0.5016882011762647  
0.6832822034208874 0.1652915499953025 0.4985087922917728  
0.4348964397399868 0.2141036342585991 0.5187890608042309  
0.5380770687635632 0.4079634725846972 0.6765227409497570  
0.4448071764900163 0.6202175643445642 0.5912153940029441  
0.6573305878359292 0.5512055551166313 0.4864732742666291  
0.3451589658420602 0.4529854503940953 0.6861944967089357  
0.4962014380864659 0.3003969087449079 0.6108121428990003  
0.3921021495741357 0.2445518911989097 0.8602969677784245  
0.7900582395594853 0.3770889563368840 0.6147704273773300  
0.3748051860827815 0.4662915860807146 0.8480642656687039  
0.8723501134089418 0.4821788950199988 0.3539274622698940  
0.6860010683214099 0.3706078690093264 0.4978188071857446  
0.3176098462268797 0.8345966455774487 0.5004264194788917  
0.5659565033962579 0.7856254210800486 0.4800562752192121  
0.5002287742834213 0.4999623185781275 0.4996532772780853

0.0637923731975931 0.5863392609837348 0.5184593381434439  
0.6694276436225337 0.6848701585337764 0.0303171905109281  
0.1992269861431382 0.7806377479918396 0.5049178894973920  
0.5512522782137879 0.8407169939460104 0.2329155232736966  
0.5827224277859600 0.1021291695694941 0.4885926205871698  
0.8287814721931497 0.5506634344614056 0.2138651083803964  
0.3441018826468607 0.6672023616278437 0.2373026646018985  
0.5874793700127086 0.3795363809901602 0.2544464646342064  
0.2807889822078025 0.3203199614803225 0.5417531260816517  
0.9363521847239085 0.4134023295778988 0.4809245137632914  
0.3314230271775358 0.3154070196732803 0.9685853237375497  
0.8014328581091945 0.2191811132266679 0.4944564936173563  
0.4488733907000793 0.1594208358325488 0.7662295926126959  
0.4183739335503560 0.8979351183520663 0.5098840981965225  
0.1714653072921308 0.4490579883109120 0.7854579346149322  
0.6560991586804121 0.3328635758028895 0.7622256516728854  
0.4123417607797961 0.6212278811759973 0.7445942947596933  
0.7200565852970016 0.6792545432008197 0.4572478007728833  
0.1857820428490484 0.8584571613716179 0.3811096209221887  
0.3630316127021516 0.5897805905815048 0.1817544306235988  
0.7069362879379213 0.2956473668706252 0.2280577278510521  
0.5791433334255700 0.7461361255976016 0.9640714162834385  
0.4372035189864221 0.9249609405920580 0.2056993133440628  
0.5690602621183132 0.9834021310173142 0.5986443614888657

0.2510521048426497 0.3600477453172175 0.4319256133376328  
0.9869646567700556 0.7047086972838343 0.5202633763280389  
0.8791031940974960 0.4485945825342910 0.1790599699915418  
0.8148201647502304 0.1411051326421884 0.6182829449027025  
0.6373418836962657 0.4105439726315225 0.8174055238884961  
0.2925757939581359 0.7048483142386104 0.7707404451030158  
0.4218483499832786 0.2541994158243881 0.0346744240185259  
0.5628871132483226 0.0750818224992642 0.7934053883131753  
0.4323746182484030 0.0163427425726965 0.3993978934736262  
0.7498758009504485 0.6396335921007932 0.5669780678230580  
0.0133227918814498 0.2950416032499845 0.4791808850152037  
0.1211448397334465 0.5510752342613188 0.8203098391974990  
0.2203369752992330 0.8136353769631199 0.9941278017727271  
0.8872953438732978 0.2266830163377236 0.8396969914633345  
0.1126998212211987 0.7733842390796610 0.1602073151209851  
0.9704483729254250 0.7546688983877061 0.1143641946182541  
0.9222872310508379 0.2047171679078374 0.0516550334724428  
0.0122539119035494 0.7800424739360565 0.2213495836420449  
0.7645326137281785 0.1348626369658916 0.9682342877650143  
0.1506830375957264 0.8504252021527634 0.8719895013542711  
0.9506720116486846 0.9211984398380082 0.8711953367376353  
0.9760413676259958 0.8314004532319572 0.9479788993309555  
0.7431765007568529 0.9920743624924881 0.1336862861911499  
0.9810628670765951 0.0812428689595350 0.7660286936013847

0.0295495076582100 0.2453937648179831 0.8855437095463614  
0.2233850232041874 0.8594840815141538 0.8950211750477592  
0.0599859506287785 0.2295058648981438 0.8018619739889630  
0.0743982304187938 0.7479359315124583 0.0509897998189430  
0.8312886888210116 0.1595082976573110 0.8657151561811176  
0.0777118401662165 0.7953449783310731 0.9482524086024213  
0.1248762059796888 0.9431162523094443 0.7922270910827010  
0.7939625271334734 0.9653118374336174 0.9934162857246989  
0.9255989347687361 0.2521279258143423 0.9489172678720479  
0.2568190207686598 0.0079932191874192 0.8662170529143012  
0.8557077592050391 0.2430719236400023 0.9264459293744025  
0.0354274327922326 0.1459518906546577 0.7410013782982219  
0.0266401694094895 0.9779983980906479 0.7919231231375718  
0.7576434496383513 0.0418786161795239 0.1700841797992823  
0.2110485291196156 0.1112441774489241 0.8403127512845643  
0.9400130607255122 0.7705637973650070 0.1980397883076890  
0.7889470679471842 0.8888230736002569 0.1595920200193390  
0.1814323307812558 0.0100033304197993 0.7661120407107660  
0.1442886057552002 0.7569947769830563 0.0734590253932481  
0.1418091179508636 0.0107260443301769 0.1057240116221649  
0.8493214422010169 0.1496331158420077 0.1279151600808603  
0.0903358175281710 0.1935990800029188 0.9491949328055611  
0.8751231262582309 0.0569475361302310 0.2076797508514048  
0.2423556182195341 0.9581861312214670 0.8298195161346626

0.7796574827178304 0.1864322159637339 0.0057760279319936  
0.2354577975792438 0.8652075430234660 0.0316696546963655  
0.1373373667773805 0.1095267782533256 0.7412420857475865  
0.9096605209787043 0.8064664088954316 0.0507113149855414  
0.9645693447557875 0.8541169699105282 0.2589020374494666  
0.2535319086947396 0.9607217623170854 0.9689846379506406  
0.8581873839194500 0.9893405452123076 0.8941845065245531  
0.8204812373217933 0.8723693497079239 0.0727849167213463  
0.0493252539053373 0.0788678597198142 0.1287147452039434  
0.8770765626586723 0.0881400806797998 0.8295319780774051  
0.0239565469307976 0.1686654448213432 0.0519286417050822  
0.8475810189054869 0.8389487379000542 0.2208579970649893  
0.1795151400353063 0.1276976574636564 0.9271205578625654  
0.1229205562190430 0.9119281082050961 0.1703735489086995  
0.9877420701604223 0.2200261404273860 0.7785530643805458  
0.0189335254331198 0.9188244319151195 0.2338783891413385  
0.9733571234540932 0.0220666464393560 0.2079891699530876  
0.7766212019763046 0.1405752398024234 0.1048799773100839  
0.8185655538717569 0.9900630026944768 0.2337939371218738  
0.2060318443586198 0.0347546463111001 0.0064916449524262  
0.1687037988479503 0.8405633891714004 0.1341868811200584  
0.7464608702882884 0.0393467424253444 0.0309206886816042  
0.1524191189654047 0.1611235162823448 0.7790408381270808  
0.8626615219128766 0.8905410889507337 0.2586614171811021

0.7423237714280475 0.1400498423835543 0.6775140677044433  
0.8604861357786930 0.1711858807547841 0.6249194140679748  
0.8525740754595645 0.0664196920172699 0.6245652397625179  
0.7019374223877577 0.3875696144443523 0.8399882887778247  
0.5690874125777867 0.3993032474053990 0.8830003135769644  
0.6282844892424251 0.4883950715051668 0.7647762570143968  
0.2374511944793554 0.6968569099441169 0.7545209336279726  
0.3052421520072599 0.7801677344512470 0.7237778380639384  
0.2659021728622193 0.6886429937883420 0.8495700530727959  
0.4089675320356605 0.2964348775790384 0.0728984382194184  
0.4987912158360785 0.2490854220773429 0.9831522515363815  
0.4081310720950029 0.1800775510994441 0.0898395117926043  
0.5408678283836110 0.0113218919628508 0.8646707960682321  
0.6042840437683097 0.1099814369483028 0.7992731567787104  
0.6096122546369216 0.0518412853336372 0.7329968659368902  
0.4827331370248444 0.0463779497708643 0.3999432216789742  
0.3583838695106394 0.0653135858208458 0.4059877421646618  
0.4631645780452445 0.0078973355817098 0.3304357834872249  
0.7689806748192254 0.7017888594634982 0.5573865161307552  
0.8144812925891358 0.5778502142137327 0.5700059968350502  
0.6865390864134540 0.6173202450298163 0.6357474104777978  
0.0815813388167825 0.3102266121301156 0.4142078312138295  
0.9741909934130248 0.2584530165860528 0.4726189321958714  
0.0319343441169266 0.2488164368266155 0.5481169104333290

0.0399556670962866 0.5579939664962765 0.8559484353537385  
0.1381702762654413 0.6202987281384154 0.7549322482469734  
0.1546822599388946 0.5326485566006554 0.8736184877209752  
0.2582432641754693 0.8591123857457248 0.3218889723326512  
0.1398007187363248 0.8284006568799001 0.3748411929322941  
0.1483611320311553 0.9333002622855275 0.3744544817698880  
0.2984673629491397 0.6128101605541545 0.1591021101357910  
0.4312917054595289 0.6012031141589773 0.1161665082108101  
0.3721772392788694 0.5118626621133799 0.2341972656370999  
0.7623809371881833 0.3033346919167244 0.2441199687614031  
0.6940238101616671 0.2204172368482489 0.2750528285451281  
0.7333522288896006 0.3119017223242011 0.1492411912146210  
0.5920328331670603 0.7039211151600782 0.9258262867133737  
0.5021828864919868 0.7512968468124868 0.0155301694726546  
0.5929446437416956 0.8202306047791694 0.9089391558849513  
0.4592149148105236 0.9887546165440071 0.1344619880990905  
0.3958858758514410 0.8900544306570026 0.1997406029973590  
0.3903964835605436 0.9481778798644811 0.2661194489246341  
0.5186345716850127 0.9535506974464241 0.5979713074809112  
0.6431099898682788 0.9345438217524631 0.5916587090890744  
0.5384919975659628 0.9913721630757237 0.6678395985659336  
0.2320455542388089 0.2978510261272120 0.4414840784213396  
0.1863928792420282 0.4217842083249508 0.4289266456936218  
0.3143688560381008 0.3824396798786864 0.3631436861934105

0.9187387716972992 0.6895942641752981 0.5852868176321593  
0.0262421545238993 0.7412263872727465 0.5267384977320475  
0.9682830754688325 0.7509765535027881 0.4513674897364837  
0.9603141300816986 0.4416038360947283 0.1435964077723924  
0.8619540312943101 0.3793953038712985 0.2444294357419281  
0.8457350907766923 0.4670545395144217 0.1256028532552875

## 1.2 PBE+D3 relaxed structure

structure in direct coordinates:

1.0000000000000000

9.8032791024803885 -1.1039039839249452 11.2621007233697270

9.8723888941932323 11.3939869337454187 -1.3273163942366024

0.2819643296351980 9.9458702408548998 9.7594650516230086

Au Al S C H

24 1 18 78 54

Direct

0.4613076083566483 0.6079620109246306 0.2997941733539875  
0.5496833607602198 0.3919723917660818 0.3729711551690471  
0.3392430349986384 0.4358652014011781 0.5173094278867154  
0.6601547951651625 0.5728555734739871 0.2675078958725052  
0.5063518835738705 0.7178870964173214 0.3874866863169331  
0.6178391336542646 0.7817277663663447 0.0839827633674517  
0.2056188742775689 0.6035699306060991 0.3935903572043955

0.6282300849820146 0.5643423644807299 0.0675689439588893  
0.1262230807402318 0.4815660520497858 0.7056764732613914  
0.3098122983232159 0.6164230309584653 0.5331433243283215  
0.6828599731804061 0.1750703704815848 0.4565857377860354  
0.4241820477162150 0.2055657076039665 0.4977197116399807  
0.5392304274264532 0.3926010220716449 0.6988856918306396  
0.4509622472158910 0.6081331439342108 0.6259941363915900  
0.6615872762749859 0.5644719291629556 0.4815125653608661  
0.3402011923317616 0.4274034351880971 0.7316353584729569  
0.4940629526937528 0.2823023020016677 0.6116549340752329  
0.3825792362142693 0.2183657797184608 0.9152006105450994  
0.7948000645836686 0.3965534101397168 0.6057275952336738  
0.3724027322174877 0.4356663465595432 0.9313022238906044  
0.8742645825472550 0.5182302773893355 0.2938120669886146  
0.6905270917334931 0.3837272539762253 0.4661305085537037  
0.3174950139134793 0.8249017847063058 0.5426454971256618  
0.5761608343371520 0.7945693776284699 0.5017325739217853  
0.5002760919268141 0.5002219242949408 0.4993620674717718  
0.0666614507270822 0.5216538973312552 0.5621620475114639  
0.7001114640985904 0.7178316380354630 0.9367915088338066  
0.1841013500537940 0.7506172693572282 0.5778048914165410  
0.5334321252080017 0.8691769564621410 0.2058060244644864  
0.5651799131708017 0.0860828785225465 0.4844248458247904  
0.8388703904071662 0.5645313127279010 0.1300257971405259

0.3380469127723345 0.6869057604341506 0.2150551027069554  
0.5526694863901938 0.4138243601013869 0.1898544819138195  
0.2790311836023847 0.3195484113524998 0.4956366053810015  
0.9339106253291476 0.4782515373378047 0.4372323561177183  
0.3004953063485161 0.2822442407069943 0.0624039458625347  
0.8160764209763514 0.2493801406062772 0.4216949288696057  
0.4668113755659178 0.1309588486371496 0.7933855160302485  
0.4350837630514519 0.9139738671531532 0.5148571595606768  
0.1615837370542579 0.4353235360173642 0.8694636866899472  
0.6621389857921045 0.3133083750558683 0.7840484767823384  
0.4476689423396394 0.5863753997121250 0.8091970478998363  
0.7214201917005312 0.6807105615474285 0.5036670678046846  
0.1538153154340520 0.8308876733457851 0.4462187045795929  
0.3616301104444162 0.6261389978935554 0.1188314780445410  
0.6435125375638862 0.3105884228016293 0.1592100994236105  
0.6233265247293289 0.7891497246511818 0.8473052945934256  
0.4085806701254455 0.9142614115296084 0.1965948723876991  
0.5394271242802446 0.9840105971387985 0.6342079176854156  
0.2910042119065892 0.3731947671833140 0.3416007651393258  
0.9659816557873100 0.6234922417074102 0.5851522697351044  
0.8574307433961224 0.4456430529699773 0.1154266905639716  
0.8463026238151770 0.1691014584181474 0.5533310127142670  
0.6386102469659676 0.3738706844684003 0.8804372098252742  
0.3564861240050945 0.6893520036626981 0.8401270231857296

0.3774252922796393 0.2108523812397891 0.1517184914791017  
0.5916259776960828 0.0857231016592621 0.8026662546641248  
0.4609967219574926 0.0159914766723475 0.3650186621619582  
0.7094311931817359 0.6267779062464811 0.6577466473424352  
0.0345268031515218 0.3763403786297204 0.4143435067207832  
0.1428039883138013 0.5542171712307109 0.8841467600783943  
0.2270506919119200 0.8361841655991071 0.9523663887998453  
0.8833142020518707 0.2304815311375776 0.8424644513750792  
0.1169006426256516 0.7694713596876142 0.1570130050955569  
0.9735806338880977 0.7409283092599850 0.0972043242847533  
0.9150729794872134 0.1944940551192076 0.1072067525550366  
0.0136540357616468 0.7610143364050330 0.2378906767582691  
0.7582653155720180 0.1145989242731105 0.9899750790437309  
0.1595812803480428 0.8747838304401228 0.8043431031523980  
0.9539504875393945 0.9265196731025256 0.8216434829916182  
0.9803992182991905 0.8320059890709288 0.9010554018432728  
0.7362662501594954 0.9551893643027753 0.1725558978739414  
0.9831510813305755 0.0996331462453668 0.7188019917328674  
0.0266347530189961 0.2590105853517244 0.9022728582712674  
0.2315089254593872 0.8902680924457869 0.8355161586152917  
0.0591743527414508 0.2527652672589653 0.7928849546460270  
0.0807917512896523 0.7491356323819574 0.0136030730721615  
0.8273361918568796 0.1548984729507978 0.8634950990744699  
0.0851398083190773 0.8054513054202133 0.8922747939446296

0.1325062387964664 0.9725074418627315 0.7217956139465471  
0.7909442763739492 0.9450504799315027 0.9884181297712544  
0.9194273855643971 0.2508052825527542 0.9858771890939124  
0.2639472945574184 0.0447667527498865 0.8269177405185033  
0.8498340526650523 0.2359898305191308 0.9561275829814448  
0.0372512891692764 0.1724054677209566 0.6987876583739165  
0.0314363644506130 0.9981774829851560 0.7301813430231192  
0.7497570671987148 0.0032981530359919 0.2281120234167844  
0.2156267149685007 0.1465909055852208 0.8149913933554984  
0.9410447137473312 0.7471861105035629 0.2065892480115537  
0.7845923997313733 0.8533671160103040 0.1844755263278515  
0.1885135556494220 0.0477345802939553 0.7015549905392149  
0.1503780561877335 0.7639618751687678 0.0433503328943843  
0.1425493475648096 0.0159330236291098 0.1332537092577937  
0.8406292557649664 0.1251746495102850 0.1951373066890412  
0.0888361009524559 0.2081673708377423 0.9716094241342290  
0.8677100499419126 0.0274450218578650 0.2776798956713478  
0.2504615629587832 0.9966570326248885 0.7713575436295343  
0.7731568580741381 0.1637745025958353 0.0471092997388780  
0.2419427819242088 0.8853636187527059 0.0094958496624926  
0.1411120593535742 0.1448391429610112 0.6917336743695586  
0.9113816264271790 0.7917777640964943 0.0278691561950239  
0.9629669858028365 0.8275482990527010 0.3006837076091884  
0.2598087392321915 0.9883112983496929 0.9479861577897495

0.8576714202494173 0.9840227100584045 0.8662226748184096  
0.8182862516724398 0.8469453698906619 0.0707726675612790  
0.0462691081704136 0.0734319412995887 0.1778342637166261  
0.8760379532648628 0.0909177355283077 0.8029094645332933  
0.0198155477616027 0.1679443648043843 0.0984240755789756  
0.8454473843201669 0.8051928458021749 0.2498226219568735  
0.1819301437974801 0.1530087339234782 0.9287011973242940  
0.1241811396210579 0.9090378976881510 0.1965646940434240  
0.9865650396320618 0.2389317426644482 0.7615887345860131  
0.0170654864715800 0.9003229511959887 0.2806757302252691  
0.9687832687143541 0.0017736248500810 0.2692953302772665  
0.7687019215584385 0.1096857918705965 0.1639633629229493  
0.8117071185512259 0.9522208958667093 0.2979132512409493  
0.2092771142474774 0.0549058416646275 0.0110510733748583  
0.1728713769624690 0.8450625485128214 0.1359783707492710  
0.7404080041815391 0.0116393101864745 0.0514907878832176  
0.1547849829938031 0.1947711868455713 0.7496266719640303  
0.8591188066307680 0.8551258924932839 0.3077146949179337  
0.7777708015045874 0.1568801369881001 0.6373967025844536  
0.8988969689626742 0.2077393389107627 0.5509691154713678  
0.8839051237832649 0.0960673149240918 0.5480746683827533  
0.7095721808480917 0.3626496554080632 0.8912771251080542  
0.5764920225905499 0.3370397964605374 0.9674667277625346  
0.6151716154931819 0.4549234868111682 0.8422189222429353

0.2864482607777177 0.6928393211035697 0.8318587397828239  
0.3937428319243068 0.7598201978091907 0.7735613780966730  
0.3382530286573626 0.6796769525640229 0.9303227506665834  
0.3648929052081584 0.2488383458018930 0.2075365057202561  
0.4592366313363740 0.2053025807337079 0.0938607325247816  
0.3511643767818313 0.1343908622164633 0.2089354718004230  
0.5819223858446705 0.0185435699207019 0.8878582807442683  
0.6233694766793860 0.1443281270597154 0.7986890936936888  
0.6433512785070263 0.0646268140527724 0.7265595786052401  
0.5267078649403416 0.0522619418876786 0.3398799596176758  
0.3925513316958344 0.0701678638008829 0.3719806915993829  
0.4791559468078432 0.9865163338488543 0.2991511221238810  
0.7371175208700791 0.6808548347915533 0.6661054160120443  
0.7586388632160705 0.5550065026477355 0.6726176316615522  
0.6297627801608101 0.6132187228970665 0.7226934937331180  
0.0975712476324162 0.4108341135639009 0.3274280725707186  
0.0063750419462707 0.3186671605104010 0.4124970859132375  
0.0603406264695536 0.3423740988772366 0.4874535401168600  
0.0604834999492923 0.5787193682587670 0.9170993505854810  
0.1841544704798892 0.6138558682344382 0.7979148831429299  
0.1721739666581854 0.5383210427678833 0.9499994666985572  
0.2223744626515654 0.8429729102605990 0.3622229119029541  
0.1011349653537010 0.7923620698025715 0.4485776794535994  
0.1163431492333160 0.9039675478511811 0.4513823034375335

0.2906939530407513 0.6370723695925093 0.1080687247956504  
0.4236634803847750 0.6630114634463027 0.0317382201759813  
0.3852382656461231 0.5451521439542191 0.1571471444126971  
0.7137070810700195 0.3071455202502378 0.1671392551031801  
0.6061601557453500 0.2402348785950679 0.2261447095264870  
0.6614557605816245 0.3199722705926504 0.0692235225322548  
0.6359929354271898 0.7510504837175702 0.7915536769250480  
0.5414841607662737 0.7946955489588348 0.9050374040802325  
0.6495746525164563 0.8656121850428633 0.7900323509419778  
0.4182877109470269 0.9814216360804622 0.1113820275843125  
0.3768734900680357 0.8556134502120827 0.2005932651191173  
0.3568084303357182 0.9353681604535922 0.2726892217078287  
0.4737576811922182 0.9476325600080600 0.6594414953677514  
0.6079538845049370 0.9299461708087193 0.6270725395089869  
0.5212975373564248 0.0134493237428472 0.7000955221461993  
0.2634313606946108 0.3189531118882201 0.3333666440282954  
0.2417158253884892 0.4449099992619878 0.3266223832609683  
0.3706477215468595 0.3868287877311687 0.2766045395608927  
0.9029012230760358 0.5889353699135356 0.6719980627766233  
0.9940458609378169 0.6811149904108120 0.5871874803766772  
0.9402644738439960 0.6575408150423101 0.5119514766231887  
0.9396704071334128 0.4207685474003284 0.0829627216928230  
0.8156669490135471 0.3862205618815011 0.2016006240470034  
0.8283742035320500 0.4616873276124878 0.0492534089998742

## 2 Au<sub>12</sub>Al-B<sub>11</sub>H<sub>14</sub>

### 2.1 PBE relaxed structure

structure in direct coordinates:

1.0000000000000000

16.4109681395315228 -0.1348124529830274 -0.2051682072789383

-8.3229831469599382 13.8916393267433342 -0.1114224022347292

-0.3333716299853050 -0.4042468520726261 26.7753822472053216

Au Al S C H B

48 2 36 36 136 22

Direct

0.3348483395846813 0.5959059802155622 0.8980325330438816

0.1916805797710097 0.4766377345001374 0.9771231521816759

0.1879211264901315 0.6381514242068391 0.9312642561651785

0.3970218378065695 0.5418606867804741 0.9814395389368258

0.5166448666663044 0.7518701271579644 0.9538464853845312

0.5156181020351625 0.5780161935857393 0.8873051397960836

0.2432585217767453 0.6900224753741782 0.8131299431925427

0.2725547577599556 0.3815476162644416 0.8962125324603960

0.1823579220116400 0.8202164200516506 0.8934636010117813

0.3677899265646971 0.7882593778615785 0.9174124199046290

0.0689239100937584 0.3693297894372805 0.0721255936193828

0.9854054642570915 0.4436779666599406 0.9699984244376694

0.3327669669580473 0.7388000861612483 0.0870874161548940

0.4802256935415770 0.8618961583720264 0.0173441186050098  
0.4875253983025516 0.6987103184087431 0.0597075450249491  
0.2702639432395486 0.7976749961322298 0.0079444962482427  
0.1541242175071247 0.5870437188279354 0.0403999319928374  
0.1478852769075303 0.7743992008764167 0.1018818283391312  
0.4272551810865508 0.6464180994170192 0.1672593923509496  
0.3797101179225777 0.9617249433629240 0.0928909219528080  
0.4852562328264156 0.5108928703353897 0.0870520479996699  
0.3036171014371121 0.5417442042736909 0.0731554165270936  
0.5989074318829850 0.9705025915635375 0.9238221431719964  
0.6916868379317975 0.8998418488755959 0.0228132095635019  
0.6748313322398971 0.2678982914314432 0.4120497191120620  
0.5328035549721761 0.1533983482242007 0.4878974488618582  
0.5201520761773679 0.3067132347831389 0.4427640454379755  
0.7391401489615106 0.2135486504521396 0.4953395789451207  
0.8479989035210451 0.4238273864421203 0.4646703637226892  
0.8612148546862599 0.2434750434913440 0.4046048734857877  
0.5891532844648140 0.3545993001858676 0.3272489277520307  
0.6253262477746873 0.0504260716850027 0.4148784717974365  
0.5204126766680730 0.4820903595830188 0.4088897875269950  
0.7001875497094900 0.4621400043952377 0.4271832268213274  
0.4049587287000946 0.0410696279682696 0.5858905740453935  
0.3158780620435664 0.1076676803546945 0.4837956764102245  
0.6734299212539909 0.4124354387813938 0.5995898815465210

0.8113484690408370 0.5373926049616742 0.5265738079929037  
0.8241425656170804 0.3724700534598142 0.5716296877571239  
0.6054577920771180 0.4664336519124319 0.5210102700991399  
0.4916251398870344 0.2582857876376963 0.5525200001586583  
0.4804723817001388 0.4395572826691279 0.6166681317102558  
0.7702696599026879 0.3230647266327864 0.6822044876337117  
0.7110904010326635 0.6329804384323623 0.6050284449241872  
0.8298202345798131 0.1881426846136378 0.6066837634910911  
0.6439500006993484 0.2152891337693532 0.5851787277742986  
0.9255401557090011 0.6493919672727699 0.4353554635224128  
0.0181691150710037 0.5810596055615491 0.5362570726270661  
0.3356586302450282 0.6680963983973953 0.9951297034395665  
0.6723590547952938 0.3414553995894849 0.5065991051218859  
0.1503235789784370 0.7592897691620806 0.8117030707612187  
0.4196179852142947 0.4130985137477623 0.8719883968245412  
0.4626609398608892 0.9374457658540933 0.8777772415062017  
0.6273423168525127 0.7412856473860927 0.9000651459369493  
0.9272963426527596 0.3223345952180665 0.0281258171234384  
0.4663436825059364 0.4468300322732901 0.0069174675317001  
0.3240488136136932 0.6080120754440443 0.8081968458654316  
0.1216484137289555 0.3308686350147312 0.9245184173189287  
0.0233772571045208 0.5510936716291326 0.9054839434177211  
0.5046544016533119 0.5602344996623927 0.1702137189971253  
0.2347453080670050 0.9409549599337339 0.1153149766428285

0.2033974605234121 0.3946205857682585 0.1170224254270806  
0.0491744449029099 0.6081566147702944 0.0935557388380630  
0.7421511618759595 0.0262218568068775 0.9686707137324717  
0.2051606688606640 0.8882468624605906 0.9728880973123850  
0.3548762750364318 0.7367110180260426 0.1751529544245329  
0.5314566199012631 0.9982120230606029 0.0740075418024304  
0.6566697384489686 0.7860045385085783 0.0832568640849303  
0.5064896804112422 0.4342758171533845 0.3253662934839454  
0.7713345789830868 0.0770930208419855 0.3895478880059713  
0.7955179966428290 0.6095029751286987 0.3823992387904909  
0.9633421992467248 0.4090333035836196 0.4176428085914736  
0.2607771129500023 0.9891144965486802 0.5430700028507118  
0.8047890660578219 0.1190116825912142 0.5273389481681789  
0.6647066501630263 0.2670504882447915 0.3216609436311160  
0.4737558473102581 0.0064600230060776 0.4395849008576178  
0.3521003833891712 0.2120734465577172 0.4184103995138457  
0.8646604726174303 0.2551222001800468 0.6870773945210971  
0.5647542687555642 0.6060877846253092 0.6291979370396987  
0.5429549521079338 0.0674946874882636 0.6270469235719105  
0.3847693313556704 0.2733854371403552 0.6067841703286945  
0.0622841920031902 0.7122080460126057 0.4863187148644244  
0.5285478671799808 0.5462945553975374 0.4882113089509801  
0.6855142769246569 0.4009790367176080 0.6874767159835358  
0.8630706948980063 0.6782563519953229 0.5811338961765316

0.9929609342759207 0.4650393045623318 0.5935567854163608  
0.4834489295161220 0.9184290338662109 0.8130098194809889  
0.2339283979677589 0.4886173063483454 0.7815337819472745  
0.0932819283833410 0.2291648188556437 0.9647608835929731  
0.4170088079541756 0.3970243921458874 0.8041055551738907  
0.6203804008222988 0.7924076094730310 0.8405927031706568  
0.8556320538305684 0.3480872268723516 0.0695588727681198  
0.0168417475546860 0.4804489873281597 0.8499172119458009  
0.2105584659056561 0.8663189632053871 0.7730757688049508  
0.3659226579036172 0.3225597617841203 0.0137466479367561  
0.1873663784932091 0.4261213130086006 0.1805267616131445  
0.4521399044998304 0.8569143613362087 0.1964099103094767  
0.5815788513976017 0.1081523369920632 0.0378216370551172  
0.2440641725142214 0.9573052390243433 0.1836609832990135  
0.0620944458875599 0.5676207202441219 0.1552589053813662  
0.8195953460381062 0.0127480687559540 0.9254612436353469  
0.6729640839941027 0.8554659206253277 0.1411906844626145  
0.4213476612023541 0.4472596133254427 0.2005130074139458  
0.3074660221013801 0.0114770154399224 0.9665492332651482  
0.8239138276194140 0.5772860679384380 0.3221449678798223  
0.5701532342565798 0.1466623968218101 0.2983765077196452  
0.4402393275779062 0.9110570762700192 0.4847010621854722  
0.7607060003644861 0.0599116713838086 0.3213664527233959  
0.9644400928868606 0.4560668619040698 0.3556418147515501

0.1881548393865344 0.0146331383735188 0.5839331008240194  
0.3433013953075488 0.1370997038872588 0.3641896239135178  
0.5853915671240770 0.5509658423396147 0.2971711179405361  
0.7023937146255861 0.9962562867367453 0.5347591609162308  
0.5335033678501730 0.0955581675326513 0.6923807313395045  
0.7722748197971967 0.5205017185755736 0.7149301252324562  
0.8991561889040440 0.7845335591445206 0.5430778480221079  
0.5743876002019448 0.6264945762907388 0.6972315131411975  
0.3984309488038349 0.2300797850272573 0.6674678215565635  
0.1519646905522833 0.7152504928577272 0.4460576337745081  
0.0090902058618596 0.5303066537405456 0.6530588163207582  
0.8054053027236350 0.1539259264400243 0.7294656478080910  
0.6215422435703388 0.6736993536745857 0.4815102510679878  
0.1663150196059604 0.4799042636930935 0.1803933926419106  
0.2551572059778806 0.4561781446542810 0.2019048132056156  
0.1324907028230271 0.3598561336679467 0.1977322649689128  
0.4757340121677700 0.8503554034543441 0.2339997553874511  
0.4229826908460339 0.9043658272641153 0.1978012281466377  
0.5109860146055496 0.8861951339177523 0.1707429221717973  
0.5359571705474266 0.0984422239790348 0.0050646546251514  
0.6514840528161372 0.1243931755627230 0.0255376877301501  
0.5901283280359166 0.1673949345807912 0.0621422649143284  
0.2968909564948490 0.0334874990778857 0.1928835553756869  
0.2652733566576799 0.9105581974781387 0.2014701563140591

0.1738578355992644 0.9393522587929937 0.1964028799166755  
0.0216637445048278 0.5835367253697257 0.1816519115379194  
0.1370658243850542 0.6042531751895837 0.1682299572646997  
0.0317537288140457 0.4891421422245088 0.1522215031884286  
0.8866794553551571 0.0342262434033529 0.9460030185906660  
0.8333562490381894 0.0616638210243323 0.8945862633110124  
0.7867485057388066 0.9377818718091717 0.9115019074288853  
0.7498720763740252 0.9018018541665569 0.1496700051847171  
0.6387184502584660 0.8040516140185900 0.1711118406715073  
0.6414106117108318 0.9003201985273179 0.1372203074911411  
0.4567273961501073 0.4059507436504077 0.2050405484047957  
0.3556418575922322 0.4047054122023397 0.1775156934496849  
0.4053739247694281 0.4649100934000856 0.2372553410471170  
0.2826927718640491 0.0529773387223855 0.9460341217680934  
0.3649472781360075 0.0119354871687634 0.9464681303150826  
0.3329508796663063 0.0430442764993870 0.0043891039525761  
0.5104453942477463 0.8695929729046199 0.8096966027070209  
0.4150178678571805 0.8868625500673915 0.7918931195390755  
0.5350808271676186 0.9898800595560218 0.7989315894682818  
0.2240168419467494 0.4962187739538564 0.7415821484294725  
0.2608182394432603 0.4397988152541004 0.7867594844192070  
0.1659866345836889 0.4592480891889323 0.7999989083357875  
0.1512849343896931 0.2477542946430660 0.9921693910051630  
0.0284608651128764 0.2115197771944253 0.9843547706334448

0.0802293877598359 0.1673495562777561 0.9410903764552287  
0.3605564623827391 0.3225578870218868 0.7939542419367811  
0.4044622590880778 0.4487079011720212 0.7847147829904841  
0.4865717073391522 0.4078078284963880 0.7948011943759212  
0.6646519571075942 0.7822840283441082 0.8141187769175886  
0.5466148918108686 0.7564853419961324 0.8257040647692762  
0.6485272416135714 0.8699856102752577 0.8471206176915231  
0.7908360834930619 0.3314941475550270 0.0480794653132719  
0.8370405520630655 0.3006547750665902 0.1015282017686445  
0.8945181240905029 0.4242772375467041 0.0821367035529619  
0.9412961276102365 0.4341798114715303 0.8384566694365532  
0.0565843993770372 0.5318611853156554 0.8207587800410536  
0.0475048646470384 0.4358062384261885 0.8579676351463590  
0.1686483683986424 0.9013578345643722 0.7739561492023128  
0.2835175247709358 0.9173838827395286 0.7871632762819800  
0.2110656890733722 0.8419605517849718 0.7347465843320506  
0.3927658549345878 0.2821539469454777 0.0335913562132930  
0.3087840433786866 0.3211641438333075 0.0346887781559246  
0.3393202336065357 0.2906563605513028 0.9760846255829350  
0.5147565989278604 0.1509081312127378 0.6958215237915795  
0.6029390026913006 0.1223456210471952 0.7116039557036800  
0.4789067797334781 0.0285287979825952 0.7091345816246672  
0.7841475869397669 0.5108219276164263 0.7543411733329251  
0.7407070653465908 0.5656428700000049 0.7118606236942071

0.8392971174023103 0.5543495462722987 0.6952727652581743  
0.8470777689963853 0.7686465890723966 0.5125211095396551  
0.9684965386958808 0.8057274198574902 0.5276938592272558  
0.9059957211722320 0.8428671011728284 0.5675112077525668  
0.6269719232939650 0.7032210404906536 0.7052820773392199  
0.5961351713979539 0.5813474799937808 0.7163670453361561  
0.5041668233675480 0.6092382058839405 0.7096411882720659  
0.3560425456340397 0.2421885925113472 0.6943356712978357  
0.4733156361730408 0.2681772132641314 0.6807263698054840  
0.3706852183792719 0.1522025128498612 0.6629476114399822  
0.2169682514484634 0.7393323428411307 0.4691502670264995  
0.1666042446995206 0.7671509236372458 0.4166910670073207  
0.1270363785341502 0.6436703354886362 0.4292860909973015  
0.0857994379497029 0.5816477015198060 0.6596978327090639  
0.9816652163562907 0.4773166595593565 0.6827025048230837  
0.9712529855572640 0.5694497118800967 0.6520300237827641  
0.8505782457753597 0.1227859077867421 0.7335182470033956  
0.7344812040190334 0.0984537872591105 0.7146445327336366  
0.7996110141635597 0.1828164667709871 0.7655949035374192  
0.5900710798235025 0.7068232724764769 0.4588866827561446  
0.6837903988241294 0.6807939120479318 0.4633090920559937  
0.6421599195958620 0.7077241424703757 0.5190875707864109  
0.8492669020459331 0.5273085274729681 0.3265199249266004  
0.7583959950214592 0.5424967463414845 0.2983674439541275

0.8787512572901335 0.6440622044675308 0.3052982614769633  
0.5572064924419635 0.1510626875563545 0.2583997327537872  
0.5951629941044061 0.0964031052446828 0.3040324175441640  
0.5043321464140007 0.1211514464122629 0.3183904117378376  
0.4945433719737196 0.9342100690190804 0.5148661725968040  
0.3727746603820563 0.8959289740203218 0.5003197992641617  
0.4303129345663521 0.8467685814503341 0.4647889617999965  
0.7041711727208195 0.9848593373129475 0.3124033221932123  
0.7442026702136602 0.1101614058026144 0.3034922888577967  
0.8293476223048657 0.0729901986858721 0.3086563300250376  
0.0149968631364672 0.4474530048587368 0.3335235328444810  
0.8931891658426352 0.4174190202358190 0.3373899126851470  
0.9902470630335500 0.5333863075935241 0.3602804055966757  
0.1222248157341070 0.9952749597355179 0.5627622795241010  
0.1712050614960674 0.9690075306678381 0.6165603420581292  
0.2257226053496524 0.0913532011446634 0.5954329004603807  
0.2674171615834098 0.0862615674639926 0.3548740901363558  
0.3771252145106629 0.1855085403135561 0.3330727421658111  
0.3787526083187203 0.0969410373568067 0.3722207614286503  
0.5470709135649159 0.5897919965176257 0.2961411271563961  
0.6518383746541474 0.5933787247785745 0.3196797852478994  
0.6005306694116328 0.5381336280596685 0.2591884562176219  
0.7278199349133203 0.9546492058476872 0.5546193877380432  
0.6465822370502394 0.9971264214010702 0.5559020946302766

0.6744200564710567 0.9639226807305121 0.4972698615844351  
0.4489177299869027 0.6605988727306453 0.2688929448724551  
0.5160519502763563 0.8262503854347329 0.3475636627618570  
0.5156426242207033 0.6419905055507087 0.3715226568646699  
0.3410300879915127 0.4722624889326212 0.3217976223450734  
0.2276162792301193 0.5478000319164877 0.2667595549420696  
0.3421172115194722 0.7677279797105641 0.2781128772790069  
0.3458507544598177 0.8206460253126338 0.3862390439073238  
0.4717401657379199 0.7463948858537961 0.4437904972725732  
0.3419454737514442 0.5160665736260910 0.4326969247646204  
0.1629783358676065 0.4485158744468620 0.3574177184973948  
0.1653965745618891 0.6455109016479526 0.3355530128078499  
0.2640495570617603 0.6757022917547317 0.3903058175573122  
0.2451305534557235 0.5512547975092019 0.4046321249105418  
0.3404586073845408 0.6441789858065476 0.4316632267712066  
0.7540257505639687 0.2999807261790437 0.7878720988385481  
0.8185548193476606 0.4923174173008391 0.8440438278128823  
0.8469488415678441 0.3349156740156332 0.8909374687884579  
0.6782267446450163 0.1426818945418020 0.8632981437624991  
0.5354502440250215 0.1706126845606022 0.8007492937969261  
0.6285249731208680 0.3865324458433221 0.7839127783980686  
0.6499175126795862 0.4870057889131374 0.8842749959057770  
0.8039661693011197 0.4617673831360349 0.9484125088818516  
0.6984072278577003 0.2357417036812777 0.9660853270079386

0.5003305797546247 0.1196352642333949 0.9027896869205918  
0.4699869623160424 0.2790745995364219 0.8567626248260893  
0.5812882817716485 0.3493378317394189 0.9056427380143788  
0.5849711822031196 0.2436048019201209 0.9347938989172491  
0.6762653237482326 0.3501288591592342 0.9490172964743238  
0.4036244873581296 0.6533763084753943 0.3050201647866828  
0.4428471582601574 0.7492942647522796 0.3494386068261548  
0.4432545127992000 0.6429016339705242 0.3651221311826731  
0.3398876033080853 0.5423276115797933 0.3357372758757720  
0.2776071937689579 0.5890903817777513 0.3030174628922708  
0.3413875833707252 0.7169087445166582 0.3102688874477550  
0.3446165804278252 0.7485963292310416 0.3739358500721579  
0.4147356559765853 0.7039388783032834 0.4098398156076968  
0.3404393874878053 0.5677027413638243 0.4016772711721615  
0.2331940683030354 0.5280492604011826 0.3586162515544586  
0.2368390477203093 0.6440321279226993 0.3435480864495943  
0.7148766320471367 0.3044578006851353 0.8243472442837998  
0.7524310427608896 0.4157830024319580 0.8559500740376791  
0.7707450973103036 0.3273470614847014 0.8843767663475575  
0.6696190778348523 0.2117111943093377 0.8684501241162010  
0.5905280955912176 0.2308351523639871 0.8308951107956233  
0.6413497695728125 0.3564433975379941 0.8220805465353536  
0.6544082142065264 0.4156662367191970 0.8805168599525430  
0.7429735997265112 0.4010973522126804 0.9206439547729914

0.6817753049789275 0.2669612851460528 0.9295683616327111  
0.5647902862157395 0.1984245769389474 0.8932405342099869  
0.5487209430223530 0.2941051195183846 0.8643505606756960

## 2.2 PBE+D3 relaxed structure

structure in direct coordinates:

1.0000000000000000

15.0911299408439525 0.4863281561856572 -0.3390640498923854  
-7.1294552270768730 12.4369831469845966 -0.2303683784289101  
-0.5755397784881969 -0.7680926446321543 24.9545090282845941

Au Al S C H B

48 2 36 36 136 22

Direct

0.3144293876626204 0.5872155025226559 0.8691005780782558  
0.1756361923944454 0.4697119944046604 0.9539938306542998  
0.1716750640356073 0.6536965886497054 0.9091385725762966  
0.3916185806385908 0.5319662040364709 0.9561285220190637  
0.5176755686789254 0.7476063490295866 0.9323681137117067  
0.5023186323030614 0.5529302768068423 0.8555780533426118  
0.2153095557242663 0.7052800214022441 0.7852171436518636  
0.2429227059952744 0.3545032928136125 0.8605881233593760  
0.1716873302015293 0.8613788417582420 0.8750041080058540  
0.3613551534333012 0.8051700454589732 0.8994877306772950  
0.0675215744928366 0.3595525513816143 0.0571502165001457  
0.9686797541506447 0.4605156789347845 0.9543739079371797

0.3366443445518336 0.7490756578121778 0.0794610632255951  
0.4809457382207662 0.8740588384776834 0.0026008676923380  
0.4920458312662173 0.6909749302432711 0.0463375165553554  
0.2618677822037269 0.8150529229719544 0.9968055039832608  
0.1457002379552509 0.5941382267983371 0.0280193333582141  
0.1561613778859363 0.8089395031611256 0.1006387825325956  
0.4335257838767654 0.6316788983287488 0.1611527316250552  
0.3948797204995508 0.9885386263122105 0.0947885933298001  
0.4926894735642569 0.4866464545886127 0.0690359041171278  
0.3006169820218961 0.5305135357727555 0.0580402509648136  
0.5989448371041736 0.9647737772920870 0.9031847065507125  
0.6979579728532734 0.8893827606681050 0.0172529223760925  
0.6930219088166494 0.2532265615096490 0.4246833937584780  
0.5487110804235629 0.1389304550890688 0.5045792309030230  
0.5229045133998278 0.2964943118974047 0.4495567914203146  
0.7686680336188617 0.2075753239390899 0.5174373466207335  
0.8665617725503955 0.4305264759895225 0.4829450199821959  
0.8943611850127295 0.2340472288897219 0.4218567589207997  
0.5986712631433146 0.3273464895860644 0.3291983014220711  
0.6544446239942945 0.0212163554313689 0.4326790532482540  
0.5123270628778075 0.4784709852375054 0.4094393214507062  
0.7063978853043748 0.4647697306645727 0.4337119229726416  
0.4227350551423730 0.0275998688496753 0.6032236494905364  
0.3180093075194109 0.0907508887142018 0.4906316503567864

0.6794567004904014 0.4343610304622204 0.6199390883845346  
0.8187023454920122 0.5639518377239179 0.5418890857532744  
0.8454528125946437 0.3894607372238171 0.5960296674982541  
0.6025043785996156 0.4781599552055326 0.5303767770807981  
0.4965942761740133 0.2608163055189355 0.5664712261920580  
0.4693342810276774 0.4516748249478429 0.6268403702340516  
0.7947752823763642 0.3607955292126206 0.7106638228473463  
0.7034994403955628 0.6725310041268144 0.6136242253098131  
0.8614172505267854 0.1897388422680189 0.6365162219782953  
0.6652283739930842 0.2199276021530706 0.6103840894148115  
0.9234152458985782 0.6717618062055218 0.4451879183117625  
0.0351113964269990 0.6035693576149899 0.5551897206963854  
0.3283594126431723 0.6703526548904508 0.9776256816299942  
0.6848333880942733 0.3451045091521122 0.5230647279823671  
0.1522994891023031 0.8244553819942744 0.7829707961216732  
0.3864026529379427 0.3869068837803833 0.8186019023611760  
0.4663862931228279 0.9279745257639003 0.8390772979515079  
0.6376803184983794 0.7134541952168213 0.8872768528197233  
0.9165817334325163 0.3272943150169685 0.0146279158694456  
0.4578063609688383 0.4160549994113930 0.9822729111794137  
0.2774750231555434 0.5868336878713332 0.7745577196167517  
0.0932856816117810 0.3034095997993503 0.9012231948832257  
0.9971037064611108 0.5813882115229787 0.8882238306222848  
0.5151654157070494 0.5286925346425614 0.1600871450878386

0.2492014428981075 0.9906987155453314 0.1177387151688063  
0.2091745267213640 0.3684697911307442 0.1022131305672819  
0.0483084050044440 0.6297276090056353 0.0910670670209894  
0.7416695647804810 0.0276792675218383 0.9621665564329666  
0.1837485197653797 0.9153910276447496 0.9643678776007337  
0.3645258628375720 0.7450417098692997 0.1727879629440442  
0.5487945200960295 0.0011728324262861 0.0779852331110762  
0.6671948862111754 0.7617572359256888 0.0781693495990392  
0.5021884390159754 0.4121178607678597 0.3217573657169225  
0.8103998757103581 0.0511878955154778 0.4060644700350602  
0.7875350885667172 0.6218586132837216 0.3838314476081228  
0.9908347163685068 0.4165986548400243 0.4309025411490008  
0.2696162813832577 0.9675772377707069 0.5552450247873166  
0.8386310350493678 0.0993168308743182 0.5544635298562943  
0.6793110756093318 0.2237628317901976 0.3279044332897814  
0.4930978252141757 0.9745373234705840 0.4561151246644791  
0.3474976526773540 0.1966518805082060 0.4186808852263434  
0.8941352086983567 0.2769849202255808 0.7201942178597136  
0.5415721029523350 0.6345062192493449 0.6314746755554903  
0.5688698277741030 0.0583999614369995 0.6521310673167896  
0.3753486799185606 0.2691933824908055 0.6221465879720307  
0.0650586483264634 0.7446460370340982 0.5038404834959392  
0.5181091107457533 0.5656657472795893 0.4908585270509057  
0.7117030277610772 0.4631294756654623 0.7141766378605762

0.8682983161184326 0.7281836480304875 0.5941199062952001  
0.0239030919215394 0.4832591481059080 0.6174040094565711  
0.4774207824033819 0.8460584631404209 0.7851398834953183  
0.1689211339049810 0.4599550983162617 0.7532058242096151  
0.0859922389082068 0.2031208974337416 0.9469359935166217  
0.3701074917120952 0.4143126986383943 0.7492892752838155  
0.6727663820976454 0.7935760968996964 0.8286234255206797  
0.8546492143073551 0.3675914841144146 0.0645425204235187  
0.9777165111918572 0.5028128895011722 0.8257665781754517  
0.2544120484710086 0.9419280014590766 0.7568779342038796  
0.3446456417527491 0.2937962656180497 0.9919351628984078  
0.1954423651987458 0.4004393343736810 0.1718759266025494  
0.4700397074008515 0.8691953141827814 0.1994707532186291  
0.6215818128237072 0.1351864016883861 0.0570556067090317  
0.2623360690142726 0.0072024638307156 0.1914730044356199  
0.0733065525730050 0.5807467412348736 0.1537855367555925  
0.8361956625818067 0.0192978881014739 0.9222035132482597  
0.6844889021726552 0.8355019974655641 0.1424218457537122  
0.4294644764334861 0.3997556698399151 0.1842731070355671  
0.2917995800583393 0.0468720192279533 0.9655289175905429  
0.8263380520228057 0.5882516840907155 0.3208208368300803  
0.5749179830171672 0.0915220007897452 0.3097042125002814  
0.4658293837494707 0.8767672447547400 0.5063653515979664  
0.7934915377446332 0.0331617050345390 0.3325898194796774

0.9640679467298435 0.4545022962367673 0.3652883891646823  
0.1872691838513053 0.9951616070929574 0.5967568070628009  
0.3429923242678187 0.1095395545572130 0.3621472037980576  
0.5778036645127789 0.5359830514583779 0.2906534206885643  
0.7279090795305500 0.9725187840474480 0.5626184154489422  
0.5482915452041414 0.0913341382277089 0.7200877656740271  
0.8121921787791028 0.5987433149248373 0.7272589998230251  
0.8922640656378235 0.8341450378973024 0.5485455256796311  
0.548796669842773 0.6724725232708807 0.7027848083214603  
0.4020848182400065 0.2232744083632019 0.6853994763849507  
0.1623508338720802 0.7510899104078905 0.4616155700073542  
0.0394176895307024 0.5630697572347250 0.6790683014617317  
0.8330836324108362 0.1735013397442155 0.7670882258319373  
0.6169064139373857 0.6987447953296608 0.4797774907813245  
0.1647272042563184 0.4556648891426476 0.1740570615006694  
0.2694054856051605 0.4371257736302707 0.1938558948601175  
0.1453363704112340 0.3266200169123690 0.1897409358135676  
0.4933923096238023 0.8551981433097058 0.2393272604908309  
0.4423550350628050 0.9273906609721144 0.2029449757666383  
0.5319278329988661 0.8978053627155775 0.1730012334952054  
0.5796640776759405 0.1515983945139544 0.0252520051214047  
0.6912186680510710 0.1418771277464381 0.0420392569604064  
0.6383924545526756 0.1903172337914030 0.0920674541115114  
0.3212687361067590 0.0878076076129936 0.2030596769154605

0.2813904228060273 0.9493977894861324 0.2091139551535689  
0.1903312367615031 0.9962013849318077 0.2051936533065777  
0.0389731849338021 0.6031636261870423 0.1860948558739495  
0.1540510018488968 0.6137798627039162 0.1639641547577405  
0.0385167313722826 0.4942022184115194 0.1482900558977396  
0.9016398281150975 0.0378636471777538 0.9496041417032756  
0.8562468157308482 0.0780546810374949 0.8916945715249422  
0.8088816273821045 0.9397078984383863 0.9036463694250467  
0.7652376721889216 0.8780551307027749 0.1541144209619307  
0.6446947397998201 0.7785909455745661 0.1723483901543163  
0.6549555034605716 0.8918390317537052 0.1387875632371749  
0.4700064722199005 0.3532635031503883 0.1862228506972943  
0.3624306227581222 0.3589840451369442 0.1565837181618719  
0.4083902114867146 0.4110420046242393 0.2244173338161954  
0.2703304274061714 0.0972223394790704 0.9421452732697303  
0.3564624572119134 0.0447138726067086 0.9487680983634847  
0.3107808934074190 0.0769227446417615 0.0076529899200128  
0.4727710973462193 0.7730076162254227 0.8000169907684382  
0.4148290836240707 0.8258330512223746 0.7550249592407087  
0.5489785007119524 0.8918701468094297 0.7670260580008390  
0.1535390398675128 0.4582339655608660 0.7097315503023469  
0.1879434302823871 0.3970225181785796 0.7627183774730255  
0.1028407923105043 0.4478597045862569 0.7741078527423134  
0.1566183327872721 0.2294554487587920 0.9709536585720904

0.0266539680747433 0.1907616196201216 0.9738859829297764  
0.0675781885575290 0.1298108061033563 0.9233078805108471  
0.3046910565221027 0.3465530971751924 0.7289798180599809  
0.3614956603335733 0.4857568216519872 0.7466366157668310  
0.4382196631416905 0.4260209232787804 0.7300331425310260  
0.7364575635028543 0.7881366452660732 0.8121791751300601  
0.6103276138458793 0.7646882526276053 0.7981860433888732  
0.6940049021042434 0.8758696371320815 0.8411014893288024  
0.7832094606008514 0.3560606872906426 0.0453679961776692  
0.8409844796942890 0.3170135805125268 0.0984773461350083  
0.9007181110377075 0.4511137820280470 0.0778473580104388  
0.8972546745067964 0.4630073236777502 0.8133765204044240  
0.0207424845700849 0.5575227859728478 0.7957155880903455  
0.0033652023969156 0.4436580951740788 0.8311187805782060  
0.2333061179858873 0.0054053238356926 0.7583038056191694  
0.3249629703603096 0.9669480681494949 0.7812278794596509  
0.2626293391164357 0.9224561564568516 0.7151681150720139  
0.3665015730361753 0.2407293249194216 0.0124890303469544  
0.2931502848434432 0.3085172404602922 0.0159520317052839  
0.3092921231952848 0.2592057881281831 0.9518794883971107  
0.5424893903568884 0.1643537694263382 0.7220997206332467  
0.6120656216532731 0.1021360109905323 0.7469906291971143  
0.4793610838932829 0.0259768747272253 0.7327656247295847  
0.8432436454787139 0.6063579993569334 0.7687077544414369

0.7785986349804765 0.6515674785706714 0.7224701138556889  
0.8710105117171937 0.6188830592030878 0.6991421118055620  
0.8309717137877231 0.8101500826546225 0.5174797039393605  
0.9620254948318677 0.8521933946809721 0.5295746770572561  
0.9010025008159979 0.9038881330947004 0.5723654187318449  
0.5974454029948703 0.7581505855705712 0.7080446633047142  
0.5792902495821634 0.6313158133393698 0.7277444458965728  
0.4728224294559384 0.6527394657841536 0.7139387027141767  
0.3505522677203483 0.2234783446915626 0.7147984166911493  
0.4797126336030680 0.2731477488361204 0.7013585292378879  
0.3891109554731725 0.1419509954733560 0.6768853431785981  
0.2303022345808412 0.7722859370687707 0.4874735909947264  
0.1769728828776340 0.8122455604209144 0.4330795965788239  
0.1384815573071314 0.6745694639225110 0.4402249554188903  
0.1199946573268140 0.6144784813721132 0.6889489532951666  
0.0069953458519619 0.5090814101555700 0.7111215758301047  
0.0018151900163788 0.6118376859113867 0.6744483729452757  
0.8818207530813358 0.1370888091441663 0.7745703120627134  
0.7592594240209758 0.1136609685673379 0.7500501520420974  
0.8251342894272148 0.2103662061155688 0.8044038469787316  
0.5860511787687448 0.7336471922882688 0.4507007660330034  
0.6826179744340262 0.6964454104987510 0.4643944787452428  
0.6377721215752697 0.7443797932361751 0.5185619393877255  
0.8643758588201453 0.5406732151166262 0.3274248234658606

0.7587731559290701 0.5431578430880867 0.2939268036313644  
0.8767946399891826 0.6622630317623276 0.3032267347577413  
0.5565855474846670 0.0860694086189962 0.2663322047575266  
0.5990415777608501 0.0326523999770866 0.3199674958101971  
0.5089494046071774 0.0767491804562842 0.3315147646843050  
0.5238337311687975 0.9062501214725749 0.5394501650839351  
0.3937047293578312 0.8610502244231016 0.5219106253603346  
0.4591919453458158 0.8044298782579126 0.4865869132930232  
0.7356407999482449 0.9517299956219156 0.3216893074373093  
0.7714176196328921 0.0894977299162747 0.3157674486565278  
0.8653420887694689 0.0466181479178574 0.3175478110298821  
0.0067647729734133 0.4375427029359912 0.3357446420949667  
0.8834459030389462 0.4115406834096058 0.3537260159404668  
0.9898742346020424 0.5399661815220600 0.3687747585403746  
0.1180088767284750 0.9739617473650747 0.5719589240067081  
0.1701563510459905 0.9449145152438053 0.6309988681304920  
0.2224612293207471 0.0790436588237126 0.6102401006351836  
0.2639465665703838 0.0566951247565947 0.3493735364498186  
0.3809429044360356 0.1596624430979036 0.3294627421565355  
0.3800207573052524 0.0625530389994630 0.3736398845765163  
0.5290425306131585 0.5719229329911917 0.2820491150626266  
0.6411361552507061 0.5897380663465528 0.3183023515971824  
0.6045185699574385 0.5194901266294214 0.2533506044346760  
0.7507739125400428 0.9224584634162472 0.5856321009376906

0.6712394360317264 0.9837516674138984 0.5836127317717834  
0.6972148639480706 0.9354008165926294 0.5222382002380608  
0.4670776429780086 0.6932221459369466 0.2668291814971064  
0.5001347588775652 0.8185641191955286 0.3738086351672577  
0.4996055991146329 0.6109975896931175 0.3680883515041476  
0.3393167011556732 0.4635205914381537 0.2845651309466006  
0.2357884286804657 0.5846119068489007 0.2368787675364246  
0.3458033956782400 0.8109189107230880 0.2871775912692439  
0.3084214603855596 0.8010486841275621 0.4038153165626283  
0.4151748570651576 0.6715977496251569 0.4550471098126035  
0.2959098479851741 0.4409297328516651 0.4017120130753380  
0.1384638357823413 0.4253890046661561 0.3071358789786587  
0.1398966864471628 0.6517176945826221 0.3178450855733771  
0.2227441546893150 0.6454526913146119 0.3817194237699171  
0.2003032635782031 0.5012003352791963 0.3751136642760386  
0.2874411243825425 0.5782098797317313 0.4209614603993206  
0.7019480859486135 0.2765981163831370 0.7811876642698745  
0.7724805805343220 0.4957832336524010 0.8401561703767567  
0.8423882270354429 0.3352823363122019 0.8783748578721878  
0.6758081482043035 0.1247709690844934 0.8620161532945890  
0.4880456636342117 0.1349578443105665 0.8152036001316618  
0.5568499958682311 0.3643303363361021 0.7936382201591408  
0.6115256877670761 0.4880076512830216 0.9032582201259960  
0.8019267578113779 0.4783746415501106 0.9522677367327553

0.7266582546142780 0.2347049278225609 0.9719836310622295  
0.5021243564000312 0.0913577078963675 0.9245911754047795  
0.4291943087991504 0.2570683660881324 0.8873392335370407  
0.5620546132200165 0.3425984519112235 0.9277743755230420  
0.5876748525294559 0.2332218189577469 0.9539400474368156  
0.6813838885198468 0.3511790229853837 0.9622823838103202  
0.4041020804424456 0.6660487337983766 0.2989231355067837  
0.4243578559018570 0.7392780326312217 0.3601276978764134  
0.4224870773508489 0.6154781313022718 0.3589607730462540  
0.3295475480413265 0.5306763106746419 0.3093461649316666  
0.2738308912903660 0.6049049548865342 0.2814705039155594  
0.3337817367837666 0.7353884743231874 0.3112523206469184  
0.3117691403341435 0.7294766541374413 0.3801313695592398  
0.3715544272870916 0.6532849131139971 0.4116995658443916  
0.3032449430621211 0.5163419642775617 0.3791265270112620  
0.2082299290598111 0.5065451001091184 0.3251821842199510  
0.2130011010943021 0.6416694326657550 0.3286962185392707  
0.6750132274464710 0.2879959539873761 0.8243064775794843  
0.7162705935627505 0.4127800814896122 0.8571611652787204  
0.7591182429411734 0.3248465085900251 0.8815347907641458  
0.6573681205494438 0.1962681185045113 0.8724479012897820  
0.5527435253018724 0.2056378436475830 0.8429234829466243  
0.5893232758727474 0.3393024441252291 0.8319505124856155  
0.6215194867458740 0.4110768340086093 0.8948170912117108

0.7344236922473019 0.4060063859552410 0.9263319062613352  
0.6894797252017171 0.2630859099117465 0.9375458955988412  
0.5561543795168450 0.1783613529488256 0.9105047612452256  
0.5149923495541316 0.2761013599686394 0.8858727039358587

### 3 Au<sub>12</sub>Al-Au<sub>13</sub>

#### 3.1 PBE relaxed structure

structure in direct coordinates:

1.0000000000000000

17.7372989734975768 -0.2732111674930640 -0.1670117872367771

-0.2725767124826031 18.0364558241762722 -0.1397574081535194

-0.1659115129080934 -0.1409321765127521 17.5969621723655756

Au Al S C H

49 1 36 36 108

Direct

0.4752873916931009 0.3824211674536997 0.3039543599138668

0.4049255026383989 0.2903231073493728 0.4255661021920432

0.3205144529545549 0.4121716699673357 0.3530371088771389

0.5648940349491554 0.3469167918109619 0.4267854223027214

0.5684009457377641 0.5078312252347814 0.3748478707470753

0.6551202195380199 0.3712711319466209 0.2809415765966037

0.3463874500975805 0.4450781001277377 0.1773802197563796

0.5261937566345125 0.2188859971088775 0.3041831326250843

0.2291035869163807 0.5475952187564275 0.2964210789888568

0.4124222239265620 0.5327933240730758 0.3217448083419328  
0.3468506323601730 0.2100196009836850 0.5675626756030283  
0.2282986220472409 0.2574296118683819 0.4137132221307951  
0.4153459683201177 0.5009805516092172 0.5866925231395470  
0.4835611896920469 0.5950437671316706 0.4657105828491908  
0.5720238992750453 0.4726048674129828 0.5395439222705676  
0.3246265667575017 0.5359596103286108 0.4656640822461284  
0.3207146975619679 0.3768005803103804 0.5190323326394548  
0.2231166059483414 0.5072917792737357 0.6056233650197385  
0.5454718303005563 0.4404992016142160 0.7139994042739062  
0.3506001129954441 0.6625964492524048 0.5849350147097638  
0.6591950937118440 0.3319034534421377 0.5966703220084426  
0.4793161025243080 0.3518110599946738 0.5679552152212253  
0.5411175411484734 0.6758774055513612 0.3219129339442617  
0.6591983162519455 0.6293766121709936 0.4758543083776772  
0.0283761431356595 0.9429419160325878 0.8537463419402940  
0.9633887774520460 0.8484021262137844 0.9773542812023948  
0.8711156766606365 0.9709841327384297 0.9025315918993826  
0.1209789036327251 0.9070138543281985 0.9792414223962069  
0.1238463838481394 0.0681889562316229 0.9225600761598400  
0.2215925507108807 0.9390629002552018 0.8385504014288614  
0.9010912597460745 0.0031397492255536 0.7289561123290653  
0.0925599853378571 0.7800042622728256 0.8592255677405731  
0.7853417279812334 0.1147501977657726 0.8492871167526701

0.9656127875434990 0.0953567220133422 0.8741298774598576  
0.9055802927071852 0.7685546276708024 0.1244673685955178  
0.7856690052847171 0.8164113217619331 0.9672187270800805  
0.9692964336496459 0.0623033149962069 0.1435091666482364  
0.0370310199190769 0.1560708678545950 0.0203378380069950  
0.1258827702434999 0.0341025509340014 0.0932797556967984  
0.8778362595269016 0.1006148679302470 0.0167054185918403  
0.8741274790979361 0.9360991848856912 0.0721072970655428  
0.7886607892907591 0.0720903459800866 0.1637179675448621  
0.0961361426362259 0.0007293247058371 0.2681887305396131  
0.9201658545985509 0.2287738592833506 0.1399437637827816  
0.2160184156388283 0.8963780796391632 0.1462376810190520  
0.0308986354457943 0.9102844747705063 0.1239751590403344  
0.0962791703319184 0.2357513337571646 0.8752602029358556  
0.2170551221648509 0.1871068253839212 0.0325139183198786  
0.9986165844305432 0.0028383316440994 0.9983236732702423  
0.4454369102361895 0.4423194183261927 0.4459860373346345  
0.2343659949722152 0.5075843257709920 0.1709548298162247  
0.6396748234576961 0.2469591826920094 0.2480969958450601  
0.4369979766511136 0.6410640733816990 0.2460931567553430  
0.6840871326334295 0.4954851552143111 0.3064672629130669  
0.2488713793056121 0.1577870850131688 0.4926231943557084  
0.6761516399736394 0.2868914415067536 0.4742672989504655  
0.4526928453026215 0.3739702498660762 0.1678483988470276

0.4157154525147817 0.1740177384989110 0.3570659582970066  
0.1969032028759941 0.3541819010368314 0.3359248617835888  
0.6548036397174997 0.3731032324489760 0.7220589714751569  
0.2357747084270017 0.6315276274563288 0.6388683959086734  
0.4512391967545000 0.2442930501157505 0.6433932203612045  
0.2017886612045601 0.3815494700944910 0.5837872893725091  
0.6396849375064377 0.7278951628712846 0.3956904946801103  
0.2106674738743877 0.5905882414781090 0.4189826390727376  
0.4391202147224220 0.5123796182186524 0.7217737748852784  
0.4639068527258132 0.7076775379080260 0.5375950691200799  
0.6913655420985876 0.5380799205530664 0.5602836156822093  
0.7920432565223550 0.0715071705248604 0.7245233727012632  
0.2068833258379357 0.8146203842967807 0.8052181881952265  
0.9923549590665104 0.2024865838072074 0.7978138573376441  
0.2434093347363984 0.0651414794402143 0.8603851879195403  
0.8071037149932891 0.7189997212064654 0.0486570566881284  
0.2359624326735243 0.8536521232469880 0.0235376896743915  
0.0069873452025462 0.9303390184177545 0.7188524440336508  
0.9796178855848368 0.7337599539142374 0.9074891896603603  
0.7519827414221467 0.9068484671219252 0.8820580096047337  
0.2080946589695785 0.9376029596379283 0.2713575503126933  
0.8070601691522086 0.1967239285833173 0.1955734253274102  
0.0090874968811647 0.8030294426284357 0.2018589024009927  
0.7585187890593303 0.9474958820398030 0.1394655009913564

0.1945161428915938 0.2853197100443694 0.9520327375886026  
0.7667825744763235 0.1610988707475371 0.9712985257462137  
0.9900736223394091 0.0726054608880773 0.2794624459069652  
0.0305920316507269 0.2742180422761749 0.0864981327131744  
0.2491281511733732 0.0908091346246209 0.1109635353142409  
0.4764115532779343 0.6083878664501512 0.1564856448175007  
0.4119812675630712 0.2809385149090957 0.1475725554387211  
0.4456992922689267 0.1010501548474778 0.4213889804260589  
0.6218486516694455 0.2461018539128546 0.1453995547023936  
0.6712376940197728 0.5374000469696583 0.2130375158618278  
0.1664942452731211 0.1542527223864596 0.5537537352870743  
0.1899895001825200 0.3175256208949122 0.2385371801356939  
0.2551313557371913 0.5924690057666169 0.1189786772798129  
0.6519921920129903 0.1876888286433243 0.4809647546987037  
0.4127502736280277 0.2795608404885286 0.7322775604160938  
0.4758125783220635 0.6071371764584370 0.7406385169871186  
0.4391461553670197 0.7818140360861392 0.4723138756501015  
0.2551154908867588 0.6288965536424840 0.7414594975355229  
0.2148072030442947 0.3441536972006034 0.6793230845245972  
0.7222680059488624 0.7293404224567226 0.3347340339384104  
0.6914171143036469 0.5850495491715648 0.6533645931150076  
0.6299759210976887 0.2895273899206074 0.7753563236702234  
0.2303047747949236 0.6904592500834497 0.4132933414142173  
0.0320996119128623 0.1659346750762651 0.7100920475280148

0.9688262166890951 0.8359448271830772 0.7008890583001985  
0.0054133989068603 0.6602295003767296 0.9730745215228680  
0.1866020953239271 0.8182906281615558 0.7028817304530577  
0.2305023130248856 0.1020180354236189 0.7646051899585444  
0.7243225540003451 0.7174434419286158 0.1093865080469527  
0.7523703376516053 0.8592331871323395 0.7893169407201626  
0.8166429788103002 0.1546590600161579 0.6705772056794999  
0.2162029043368179 0.7537735723321148 0.0288350071178769  
0.9682701471807107 0.8365751118699976 0.2904622045813881  
0.0320887535642314 0.1654096342430762 0.2979153212762355  
0.0000098673582158 0.3469131952065254 0.0221118016460977  
0.8245327286401860 0.1974698762146474 0.2982966411450576  
0.7729114550748832 0.9064147523431885 0.2330940660137202  
0.2770041791933835 0.2889968199399462 0.8910209556685373  
0.2542997471691706 0.1277614955887856 0.2082731753819829  
0.1880591042389312 0.8531046510107174 0.3241353931333606  
0.7932229653467218 0.2597938958921873 0.9641359210693210  
0.3704510526409308 0.3211113116340840 0.7214460426184246  
0.4595628767098674 0.3052252028408660 0.7659381322654397  
0.3877947315177792 0.2326972560568308 0.7629151963650145  
0.5008993824223680 0.6098151470975921 0.7980430173083803  
0.4281039872710366 0.6443464153688439 0.7369186974713102  
0.5176618715866610 0.6238062879297743 0.6988294534073063  
0.3971699171551535 0.7626221792268524 0.4295251971266225

0.4910094609612088 0.7999893587791220 0.4441682648704628  
0.4172247541142440 0.8278160950025111 0.5059182245449350  
0.2737936441150026 0.6845553959249600 0.7611585019701366  
0.2978090473533541 0.5881443272420199 0.7545604851319965  
0.2019503050233382 0.6135977711409524 0.7687964801084490  
0.1615076126833443 0.3486692864947756 0.7094689468331907  
0.2596538541491853 0.3748854074237400 0.7109681068533575  
0.2294318966416284 0.2856487198553381 0.6735737255982528  
0.7698689127285476 0.7535239173895079 0.3682494111483834  
0.7102265701123400 0.7644814199944321 0.2860966133789447  
0.7357174367405079 0.6733841050169431 0.3154423414422780  
0.7419906710708162 0.6214546612940168 0.6577091242503812  
0.6936931332063025 0.5424750856062133 0.6970948263371426  
0.6410409327239890 0.6178067666809071 0.6602839335134263  
0.6804059195756480 0.2559566035178449 0.7797082050333657  
0.5843527535789690 0.2570550284263291 0.7466763149165203  
0.6129499930372333 0.3067948209899853 0.8323566145783943  
0.1816084467710581 0.7151073971265944 0.3853562805719832  
0.2812450439667202 0.7023763419318030 0.3809359201817699  
0.2374640206606387 0.7128758117291838 0.4714319685501991  
0.5191534297677549 0.5670554264446679 0.1663257788271437  
0.4300259037900176 0.5830322414112601 0.1219968086057861  
0.5010270324824901 0.6563339336578338 0.1272456544127323  
0.3865457805785155 0.2797069374706211 0.0903018301323470

0.4574895432796993 0.2411947875483875 0.1510887615051075  
0.3691676140847733 0.2663464700623592 0.1890974785770965  
0.4894219405171256 0.1215645854352232 0.4617171006588805  
0.3958688633420877 0.0818455926645640 0.4522989088793068  
0.4670121269462584 0.0555355085488785 0.3866709566307875  
0.6044519531780637 0.1895065190994671 0.1277765874349228  
0.5788371710853681 0.2857364197426051 0.1298814944896947  
0.6755873078215586 0.2609866721969212 0.1190468647430194  
0.7248048805085432 0.5343631501734549 0.1831455477475501  
0.6266951306989981 0.5082569070175893 0.1794746591866669  
0.6564548346727932 0.5955182239731158 0.2217886696848339  
0.1185975988674883 0.1316305043425530 0.5195940406702633  
0.1783267540059228 0.1172445114057297 0.6010135090290163  
0.1536988320523989 0.2096469000897585 0.5752449894948128  
0.1390666754953784 0.2818481827756472 0.2330982568736317  
0.1841717751494159 0.3646170997328468 0.2005104065575267  
0.2396483182432121 0.2864822632751896 0.2235195577765552  
0.2038751259232754 0.6247939289834719 0.1186927226517938  
0.3014558856466252 0.6251038280625210 0.1463237793003742  
0.2694140558184088 0.5770442283771189 0.0606062004065464  
0.6989873613862443 0.1608862354964486 0.5098216408699869  
0.6002121079581926 0.1782972741991458 0.5127288855159904  
0.6446307829710918 0.1651193039391217 0.4229240296356593  
0.9258927998263999 0.8779838767749766 0.2793023613118280

0.0140478043697527 0.8623823735877352 0.3254825212989303  
0.9429246489241834 0.7891797711854593 0.3200745695909788  
0.0577134572013804 0.1675938070337182 0.3551402519511910  
0.9872949274446299 0.2058774248594304 0.2935178003265193  
0.0748006706977904 0.1784089642093676 0.2557240519445259  
0.9563153300172758 0.3258717461618659 0.9820025493908062  
0.0495458286780988 0.3661588791093280 0.9907385193230382  
0.9784391705757329 0.3926040670869071 0.0564450450074290  
0.8418508045730348 0.2540015101236932 0.3163223834524018  
0.8677139017705855 0.1579504528707218 0.3136980573127488  
0.7710680266552856 0.1818752869670490 0.3248840884119275  
0.7198595743465006 0.9091411912953760 0.2640153818815847  
0.8178052575512638 0.9360370182057736 0.2657379221023675  
0.7883759095853762 0.8484523505544388 0.2244279684575901  
0.3252205727134623 0.3109864210207292 0.9251847791872265  
0.2654348762755276 0.3265252244465344 0.8440851928752977  
0.2894299809902776 0.2336624741189652 0.8690125404716298  
0.3042579186076040 0.1647303852296389 0.2145636623456255  
0.2605683367114651 0.0808480396252165 0.2464918627606352  
0.2034876057817030 0.1573438505409328 0.2226142522544947  
0.2394549196315126 0.8209277392753904 0.3242524866128420  
0.1416383022855712 0.8202123188977311 0.2971768141515696  
0.1739332266637419 0.8687488979021651 0.3825279582262198  
0.7471602070159591 0.2878969726191869 0.9350428569773399

0.8453416335470649 0.2676869430212108 0.9325400086159448  
0.8013310762110279 0.2825374304028259 0.0220545925713367  
0.0741548827286493 0.1245012890253960 0.7224386373546494  
0.9858574623856100 0.1394738290096953 0.6762072219509463  
0.0575124812092369 0.2121444456216963 0.6787542436836276  
0.9437507655752810 0.8328057149132633 0.6434594548775223  
0.0158228601109158 0.7979357582689204 0.7053864488212369  
0.9267238004218825 0.8205252897164215 0.7429370622574467  
0.0473801949567516 0.6802021742606570 0.0155573994640363  
0.9539046052726690 0.6418973220570194 0.0017858584684944  
0.0276051670659925 0.6140115016820786 0.9399362512126430  
0.1670700484453747 0.7630483487562572 0.6827174067141257  
0.1438301070601682 0.8592647569992877 0.6907639131395911  
0.2393693613753101 0.8338589738246327 0.6748818071310296  
0.2836274030734600 0.0969840492840390 0.7341474881768804  
0.1853251374870979 0.0712941849457778 0.7334093996982034  
0.2159139581337044 0.1605975815088598 0.7700008272303691  
0.6765320452340831 0.6937696658228845 0.0757223021373576  
0.7361029374001902 0.6820395478762507 0.1579501841926287  
0.7111243381312988 0.7734067675660086 0.1289710608080696  
0.7021802906508867 0.8222449200104123 0.7850174756668267  
0.7498672224326555 0.9014858921202915 0.7452536377651953  
0.8031871185084754 0.8270409872005615 0.7827098358491753  
0.7663267010663546 0.1884268021344297 0.6664090109858520

0.8624851722848987 0.1871918842243119 0.6988908556338345  
0.8334436816744883 0.1371629080851946 0.6135430645105728  
0.2649094946354893 0.7287334061727293 0.0564376694983011  
0.1652302850364222 0.7419523334763696 0.0612158455826659  
0.2084986004622209 0.7315871990641725 0.9706413034304191

### 3.2 PBE+D3 relaxed structure

structure in direct coordinates:

1.0000000000000000

16.7593704408820621 -1.2432099757295383 -0.7240653381921076

-1.3358488927306578 15.0598065631376130 -1.2484725742164988

-0.7340414948988786 -1.1595685337384232 15.7942568520691839

Au Al S C H

49 1 36 36 108

Direct

0.4725670246626885 0.3575659040064597 0.2955870211765909

0.3959116140643772 0.2426909497569697 0.4191990850386026

0.3161816610122222 0.3813261583537362 0.3483364214351141

0.5631963649006871 0.3202630269928842 0.4330211676817685

0.5874221706589550 0.5118197657874453 0.3992968152620647

0.6438532562471870 0.3347706717300404 0.2658804322194518

0.3346068668883894 0.4187542860876182 0.1676407408334306

0.5089653983144609 0.1430786537008960 0.2995000137031109

0.2184249207291641 0.5333968567947229 0.3188754500594055

0.4173073633631069 0.5355986474457578 0.3347471443618306  
0.3324904738258305 0.1505564339272688 0.5813806371657133  
0.2116819805557617 0.1798555398553409 0.4032636593608216  
0.4265163348815881 0.5049518185041468 0.6284878967316588  
0.5086710939197889 0.6139971303543541 0.5074420781352111  
0.5903108333679696 0.4808926502988783 0.5771640168192882  
0.3336163218408524 0.5387282752649443 0.4894480927343683  
0.3189337689306557 0.3512584162904375 0.5269413115042101  
0.2306301271143343 0.4942607963064602 0.6316910207482582  
0.5665342951704264 0.4530912314450805 0.7645088797173992  
0.3800146758686946 0.6923653472149432 0.6395651778917812  
0.6681712182362746 0.3235482575399513 0.6221074866819372  
0.4808789556575914 0.3309196864068561 0.5913572418681358  
0.5751013995200497 0.7047552342023889 0.3589362519679887  
0.7026700778217974 0.6564594251663477 0.5340284655928089  
0.0170354965483260 0.9429303768298569 0.8140038163879099  
0.9335516625249165 0.8279800718671869 0.9321430138191360  
0.8487757462798033 0.9626381950444044 0.8647290617866724  
0.1116419014967441 0.9066254067626194 0.9558690181617893  
0.1288172362441683 0.0981040561026051 0.9198848692801248  
0.2181409197368510 0.9585010847091932 0.8162951226926484  
0.8788247505113448 0.9926453080715140 0.6796506477452398  
0.0653168091876301 0.7546572277350804 0.8039254121015378  
0.7706560988651868 0.1200427621550233 0.8252519613329167

0.9625408679916176 0.1180154599549543 0.8521336516589060  
0.8741133146716310 0.7372249807617848 0.0851685892554501  
0.7423497874264436 0.7849856932451887 0.9074401079761573  
0.9691845282337375 0.0859062324045696 0.1508110230271325  
0.0415859854517983 0.2033662932687722 0.0247702600559944  
0.1299356689998842 0.0659028000887543 0.0994059579803460  
0.8714771771306373 0.1219557570009567 0.0099815287833836  
0.8526129757975963 0.9298984235668633 0.0456184916276388  
0.7944637523436262 0.0998584358032948 0.1766649447587756  
0.1078287204015368 0.0247913969914838 0.2782864386216926  
0.9306861360132765 0.2981949131300583 0.1457031582890394  
0.2258070010352639 0.9106038803328675 0.1250985563776463  
0.0238098664638673 0.9071907224579223 0.1076229110620655  
0.1061153944888884 0.2953255561536829 0.8648190052790585  
0.2360117786615463 0.2611000934103222 0.0417143256654009  
0.9903048634769830 0.0148189467343362 0.9809255139273785  
0.4522389625200593 0.4318622919584186 0.4631072498407613  
0.2150143458706741 0.4757017611275045 0.1764424141143241  
0.6222812269503910 0.1785371636418150 0.2324271350364061  
0.4492184777012322 0.6725066339193951 0.2778490179320394  
0.6902500543402814 0.4895162700612232 0.3059096993871271  
0.2298561941755181 0.0655970732988858 0.4831169307146077  
0.6868893412286566 0.2745736055584386 0.4804627544361055  
0.4613283605296415 0.3825246758677901 0.1474946301820123

0.4083979614383855 0.0859537006456896 0.3776658911364041  
0.1802214536568289 0.3056587216243938 0.3501615125304222  
0.6704680891546457 0.3701031761503636 0.7687235383166113  
0.2613726212802080 0.6428747504335984 0.6950654874880120  
0.4497264335223367 0.2104377338313644 0.6715625923977272  
0.1846868880569967 0.3445983582171185 0.5740120641348428  
0.6980413542396245 0.7613468288077462 0.4419179082917881  
0.2103832749521295 0.5986564873729808 0.4583293038619590  
0.4650419204905472 0.5390321889191574 0.7806324252926289  
0.4951517765485390 0.7572842727471303 0.5863482269029736  
0.7290762447074979 0.5544511050210965 0.6228454432398763  
0.7705645504341764 0.0699501778612048 0.6790789752411313  
0.1862980614651817 0.8092737408304911 0.7545401766403002  
0.9882784778732645 0.2394111167207376 0.7730492043622590  
0.2603945945032891 0.1104814542913813 0.8684985462336218  
0.7524292688868627 0.6802295840204506 0.9990101267048499  
0.2335022345737056 0.8441515448176100 0.9855961823826841  
0.9844746506892906 0.9122921194803165 0.6610885979918069  
0.9477172029491946 0.6854897526060759 0.8506689227602888  
0.7129453251255917 0.8851401224680344 0.8168450154425139  
0.2280404326020905 0.9686635644213356 0.2680467963074073  
0.8152411319535816 0.2568269422814043 0.2081733271915420  
-0.0008713325446169 0.7721886158132559 0.1689808429569754  
0.7488617766946801 0.9443563387699692 0.1398398570328193

0.2124410123369229 0.3748715695039628 0.9631426072314776  
0.7541902913367937 0.1801600646965804 0.9656644282280770  
0.9823360822337516 0.0649031514422302 0.2992751390268454  
0.0387936474903675 0.3583502378400187 0.0792402646617839  
0.2671482445294919 0.1364848133219031 0.0978879432554144  
0.4683776301096082 0.6409050245167711 0.1663672489527532  
0.4490308422445023 0.2799414163524414 0.0672704707353171  
0.4677013364533604 0.0557859141019009 0.4678405587320489  
0.5993346147743559 0.1458464674576377 0.1162834545363664  
0.6600811416478437 0.5368489167308148 0.2114294957042794  
0.1371649353005088 0.0494453333837264 0.5357142291405337  
0.1329905047123864 0.2754328971272785 0.2406968971560281  
0.2292529930255777 0.5763678156441694 0.1259518037701717  
0.6724533875220754 0.1506369428366119 0.4657096353162755  
0.4205114375608082 0.2652134818399606 0.7719317983902408  
0.5183293363184001 0.6562434410636594 0.8029553593535670  
0.4555670149681469 0.8184819292290297 0.5055478978589817  
0.2861523657656865 0.6402984937632638 0.8083283285962213  
0.2027830302967884 0.2959400524667208 0.6700694561980539  
0.7756797634567983 0.7318281363574000 0.3734211988178466  
0.7360703944296397 0.6117752087756704 0.7340296177535955  
0.6278507556531859 0.2673730074966635 0.8070226714227421  
0.2403925827110231 0.7187494906505063 0.4528551361605569  
0.0175272632612992 0.1869196695463979 0.6715466831930160

0.9341918897314947 0.7939710846184463 0.6350129966213180  
0.9846788239533566 0.6220662492632345 0.9307590712294660  
0.1641650581962199 0.8122034567880493 0.6408342863702265  
0.2338119853171571 0.1533585062732022 0.7711087485478849  
0.6735391233255892 0.7039002887565966 0.0679537852659608  
0.7110008506233427 0.8278894958008590 0.7065117350873581  
0.8087854692264218 0.1736909788263897 0.6400042590528108  
0.1989692384560607 0.7247629689766617 0.9910688730752472  
0.9781036953131259 0.8034672671198185 0.2798153915685253  
0.9966668021094054 0.1655025388759851 0.3823307847105327  
0.9924090445515451 0.4091468336442330 0.9944007639270136  
0.8389831525923448 0.2897531779660714 0.3241070403869455  
0.7851122980363955 0.9000322401960704 0.2340345124430770  
0.3026052140315983 0.3923963266390526 0.9068209175838770  
0.3156646546982851 0.1693050934400872 0.2067145263769941  
0.2159579151420772 0.8679947144284261 0.3185409064602102  
0.7839285438342336 0.3024283299875451 0.9713065090852495  
0.3744084575137775 0.3060239383074345 0.7590361855725669  
0.4744575824763905 0.3099707269867086 0.8073685082833132  
0.3978368906450180 0.2129431079280306 0.8091031611161751  
0.5574531142504392 0.6673621631864375 0.8637630978495591  
0.4726177008431899 0.7004452846087227 0.8071265952846066  
0.5550970870908710 0.6711481846247158 0.7515094209115543  
0.4112916635384373 0.7727757993658475 0.4575815782214178

0.5069936701454545 0.8470221077360197 0.4741141900955583  
0.4278300526885352 0.8731429939128963 0.5377462125098270  
0.3031571453727546 0.7102369224366459 0.8419172466943188  
0.3350590547568791 0.6018503238310812 0.8174788216711601  
0.2312893426561392 0.6073806381784822 0.8312350147346208  
0.1570669901945637 0.3083053775243027 0.7138874032479292  
0.2628681114983611 0.3250045305127508 0.7032924972768381  
0.1998254965970306 0.2233477936725986 0.6495769479684889  
0.8348023233027239 0.7602076312019190 0.4099365692251737  
0.7690282604791983 0.7626921512044853 0.3157941250247551  
0.7702476634588282 0.6581799429774025 0.3562973613746973  
0.7948760435222376 0.6569678582370629 0.7496750556884610  
0.7333674461648001 0.5599563746165488 0.7754539484607496  
0.6870058503348498 0.6500037836664604 0.7447901649750436  
0.6753534040380036 0.2251827820795683 0.8098116418129818  
0.5759271680020217 0.2291823470010240 0.7631748890212848  
0.6102816036832656 0.2854006710736245 0.8715276041760657  
0.1853098718419696 0.7450361993170909 0.4352399587598163  
0.2826457721396476 0.7283373215939858 0.4049607747911806  
0.2686351014790793 0.7538287154356187 0.5164108146512288  
0.5096538555123694 0.5921751223470721 0.1607158383800111  
0.4102641349607500 0.6095391139879729 0.1291421855964045  
0.4936803042743060 0.7026261277500740 0.1429479302911505  
0.5035209299736436 0.2847736089537047 0.0335136278436974

0.4419908023038115 0.2192387167328563 0.0973435219589819  
0.3949906468248285 0.2765859702532959 0.0224044011196620  
0.5067058040197450 0.1154327329646330 0.5060404496152454  
0.4244974343515332 0.0259146636166865 0.5081448699233306  
0.5043570626922698 0.0063265606085077 0.4427872036290076  
0.5703681128764151 0.0743313047752017 0.1026615419143881  
0.5602658053413205 0.1878641877971422 0.0901052049202915  
0.6573403801613958 0.1538183722321094 0.0889190096374165  
0.7064146584540398 0.5307243624478802 0.1672155325796509  
0.6009381717686938 0.5008816511450278 0.1798081549539689  
0.6570749422210383 0.6083782533050176 0.2329770099604567  
0.0885765753374992 0.0117310953218900 0.4869418734127037  
0.1459719361539673 0.0100656833236154 0.5872491135328001  
0.1209261899375896 0.1144068437837788 0.5616715509582655  
0.0808789530696152 0.2208836389678129 0.2371931778693021  
0.1124506691103715 0.3359271839776945 0.2234972222611502  
0.1744780859023125 0.2529290227422446 0.1958641597759865  
0.1733741357378786 0.6047492778408985 0.1288549651820045  
0.2805443809623792 0.6269354944458075 0.1584735818749402  
0.2378212861968913 0.5540737229421944 0.0588225099646088  
0.7324407540266173 0.1312238046601767 0.4656658489502219  
0.6417342346749059 0.1245714809296350 0.5172796961330907  
0.6368315490950448 0.1233923201251196 0.4035345607395582  
0.9364289070805066 0.8518343920291602 0.2845193946340314

0.0355758495459434 0.8351514343583530 0.3182400596648030  
0.9527168607991332 0.7415729871895177 0.3029276573818028  
0.9407870704510272 0.1640473974522300 0.4135436667706212  
0.0093125448271345 0.2272946845910081 0.3544078427667394  
0.0478154768761959 0.1642791708023991 0.4293882609071326  
0.9545897626263194 0.3571293219510110 0.9458357830988884  
0.0419796586417881 0.4437617166548355 0.9642998151343414  
0.9562784319033563 0.4576428698521020 0.0226073439606284  
0.8608515371427609 0.3629641026195972 0.3378575738671595  
0.8843614723725520 0.2537778251054724 0.3487577283824209  
0.7827245172437616 0.2742792580074344 0.3534153382625868  
0.7407311738251782 0.9041965993299068 0.2807039565469286  
0.8442983173641929 0.9384627866150949 0.2630038843754023  
0.7908876778165369 0.8292238106043778 0.2124478130588972  
0.3526618128833771 0.4306127005353015 0.9534944975232161  
0.2913797459041352 0.4313943267628066 0.8555214772949158  
0.3184753318392897 0.3274843024953849 0.8802355718985095  
0.3726909590650608 0.2157493701536678 0.2081468295370384  
0.3277753665017076 0.1070067185419092 0.2288428166836831  
0.2770051102605383 0.2016447951347694 0.2494863390803862  
0.2719300277082984 0.8399226921634332 0.3144988661815227  
0.1645515926004565 0.8172570857724022 0.2864186991659005  
0.2079840932714752 0.8895244134425397 0.3859954082394361  
0.7311207015479809 0.3312023575521246 0.9509459531244177

0.8312924694163167 0.3172604106811408 0.9298469667283914  
0.8066751465048471 0.3316634015290356 0.0381539397904746  
0.0654248493901775 0.1481830044461219 0.6836623328687721  
0.9639682587952185 0.1401699774444641 0.6372985472016001  
0.0374043011813640 0.2393130351309617 0.6334621494611579  
0.8985587655206223 0.7833559431827800 0.5721191632474154  
0.9811506973410219 0.7512844292748492 0.6337577023866799  
0.8943320858830416 0.7768272269439805 0.6834132850092069  
0.0284213819754481 0.6661651781573800 0.9806267789222815  
0.9322521986117748 0.5933040764432189 0.9606690905310256  
0.0123649493631616 0.5679976283663880 0.8977266953164407  
0.1466574407706361 0.7424539085159688 0.6067402637868952  
0.1158964484598051 0.8513343931390578 0.6305063403311562  
0.2198311300590471 0.8447715474466934 0.6190411491297134  
0.2791552786613877 0.1449860599707337 0.7256831289947043  
0.1744762848637265 0.1178276665959748 0.7404887106060454  
0.2306482338297705 0.2249145416972929 0.7899365103438516  
0.6146474278289109 0.6753308263235964 0.0309676221689593  
0.6812153180692344 0.6710977025457926 0.1242570456895821  
0.6774810860571286 0.7771546600613661 0.0876826261328393  
0.6546105886094582 0.7787706332200793 0.6890202960088788  
0.7117642819881905 0.8789867627382525 0.6644256525903449  
0.7631496114099690 0.7940289398771322 0.6985371339497113  
0.7596210095689206 0.2130412938038128 0.6363050249994548

0.8595991880356320 0.2145660319549517 0.6840301355368883

0.8276680934184634 0.1564023084846128 0.5758677409424620

0.2525111600035692 0.6957882650630842 0.0087343239595906

0.1560951408387090 0.7169466240900334 0.0387258687825818

0.1698028140721653 0.6906080523869386 0.9274672065159999
